# Supplementary material
Source: HighWire-hosted journal article supplement (https://ard.bmj.com/content/78/4/509)
Supplement: inline-supplementary-material-1 [file inline-supplementary-material-1.pdf]

## Supplementary Methods.

### Confirmation of genotypes

DNA was extracted from tail or ear of mice following the manufacturer's instructions of Viogene Genomic DNA Extraction (Taiwan), and subjected to either Sanger sequencing at Kyoto University using sequencing primers Seq F1: 5'–

TAACTGCTGAACCAGCTCTCCAGGC-3'; Or polymerase chain reaction using primers Seq F1 and R1: 5'-ACGCTGAGCAGCAGAATAACTCCT-3', followed by restriction digest by HpyCH4III enzyme (Amplicon: 510 base pair or bp; After digestion-Wild type: 275 and 237bp; Heterozygotes: 275, 237, 161, and 74bp; Mutants: 275, 161 and 74bp), and analyzed using electrophoresis on a 3% TBE agarose gel.

### Antibodies, cell culture and flow cytometric analysis

The following monoclonal antibodies were purchased: APC-conjugated anti-CD4 (or L3T4, BioLegend, U.S.), FITC-conjugated anti-CD4 (L3T4, BioLegend), FITC-conjugated anti-B220 (BD Pharmingen, U.S.), PerCP-Cy5.5-conjugated anti-CD19 (eBioscience, U.S.), PE-conjugated anti-CXCR5 (BioLegend), FITC-conjugated anti-PD1 (clone 29F1A12, BioLegend), APC-conjugated anti-CD95 (or GL7, eBioscience), FITC-conjugated anti-CD93 (or AA4.1, eBioscience), PE-conjugated anti-CD23 (eBioscience), FITC-conjugated anti-CD21 (BioLegend), PE-conjugated anti-CD3 (BioLegend), APC-conjugated anti-SiglecH (BioLegend), PE-conjugated anti-CD11c (eBioscience), FITC-conjugated CD11b (BioLegend), and PE-conjugated anti-F4/8 (BioLegend), APC-anti-CD8 (BioLegend), PE-conjugated anti-CD62L (or MEL-14, eBioscience), FITC-conjugated anti-CD69 (clone H1.2F3, eBioscience), Biotin-conjugated anti-peanut agglutinin (PNA, BioLegend), PE-conjugated streptavidin (BioLegend).

### Gene expression analysis

Control glyceraldehyde-3-phosphate dehydrogenase (GAPDH) and target cDNAs were amplified using SYBR green method (Thunderbird qPCR Mix, Toyobo, Japan) with specific primer sets (ThermoFisher Scientific, U.S.): Gapdh (5'-ATGTTTCGTCATGGGTGTGAA,GGTGCTAAGCAGTTGGTGGT-3'), Isg15 (5'-AGCAAGCAGCCAGAAGCAGACTC,GGAAAGCCGGCACACCAATC-3'), Oas2 (5'-CCGGGCCAGTGACACAAGTTAG,CGATGGCACCGAGGACACC-3'), Irf4 (5'-CTCTTCAAGGCTTGGGCATT,TGCTCCTTTTTTGGCTCCCT-3'), Ifna (5'-CCTGAGAGAAGAAACACAGC,GAGGAAGACAGGGCTCTCC-3').

Supplementary Figure 1. PCA to exclude outliers from Asian cluster.

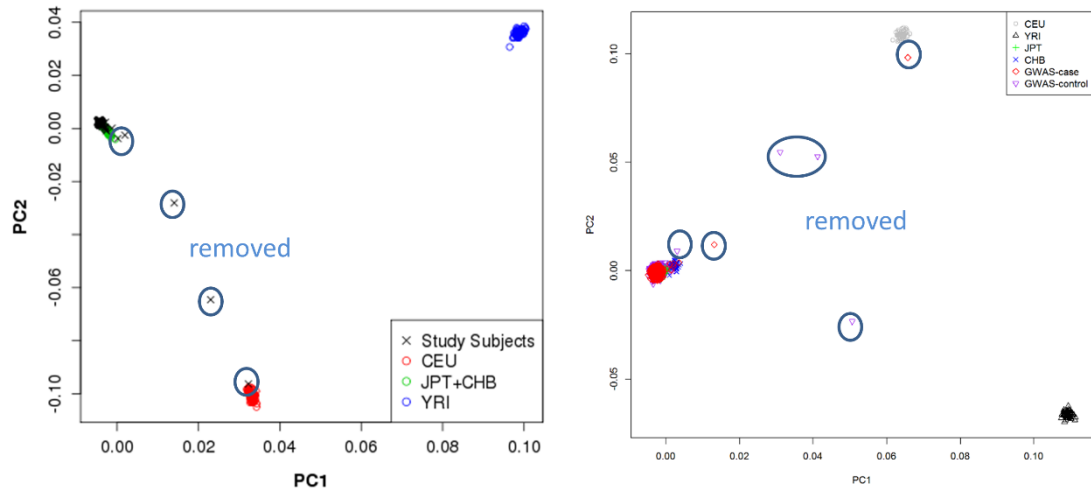

Study subjects in Study 1 and 2 are shown in left and right panels, respectively.

Supplementary Figure 2. Polygenicity found in SLE GWAS.

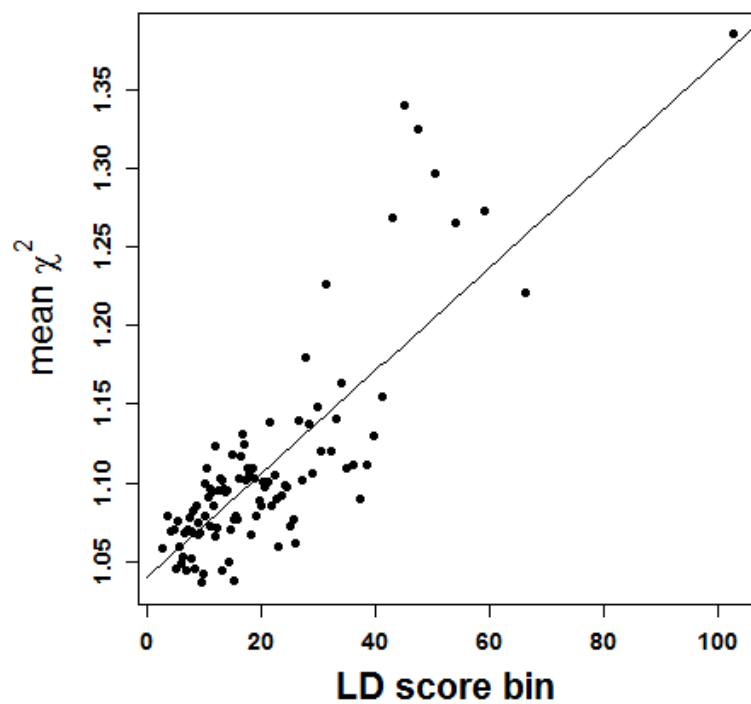

Correlation between LD score bins and mean chi-square statistics in the current study is indicated. The SNPs in the HLA region are excluded from calculation.

Supplementary Figure 3. Heritability enrichment of SLE GWAS statistics found in 10 cell groups.

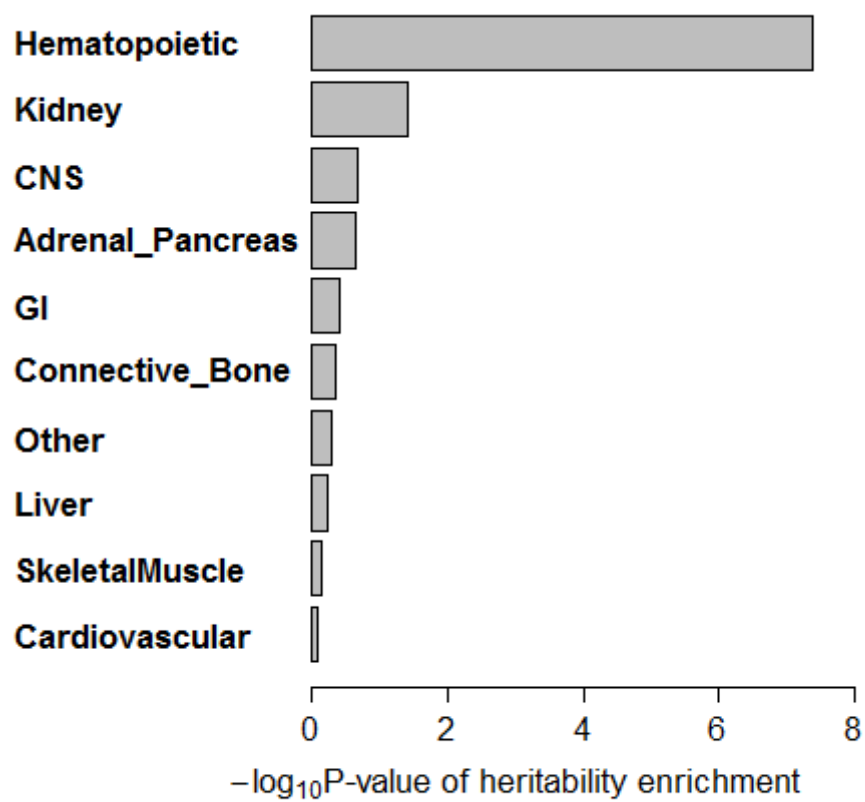

Results of heritability enrichment in cell groups evaluated by LDSC conditioning on basic annotations are indicated.

Supplementary Figure 4. Heritability enrichment in immune cells especially H3K4me1.

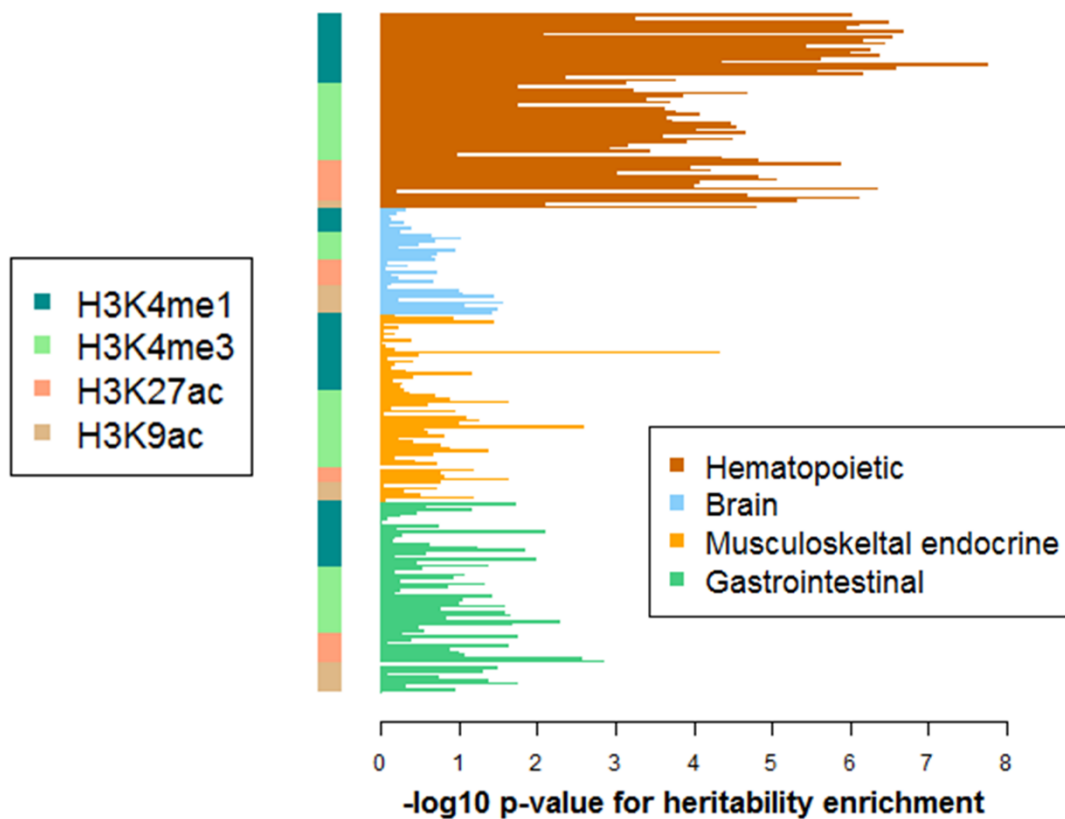

Results of heritability enrichment analysis using LDSC for a total of 220 cell types conditioning on basic annotations are indicated.

Supplementary Figure 5. No difference in organ size other than spleen and lymph node between mutant mice and heterozygous mice.

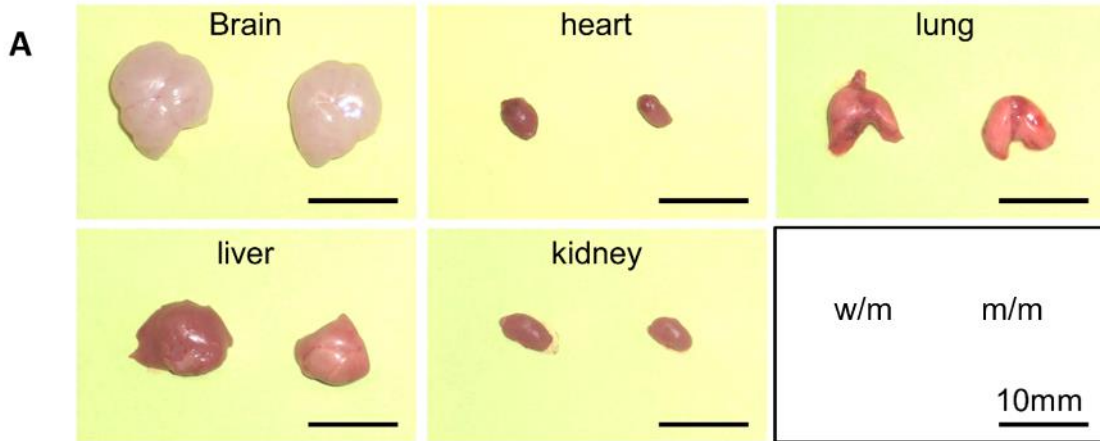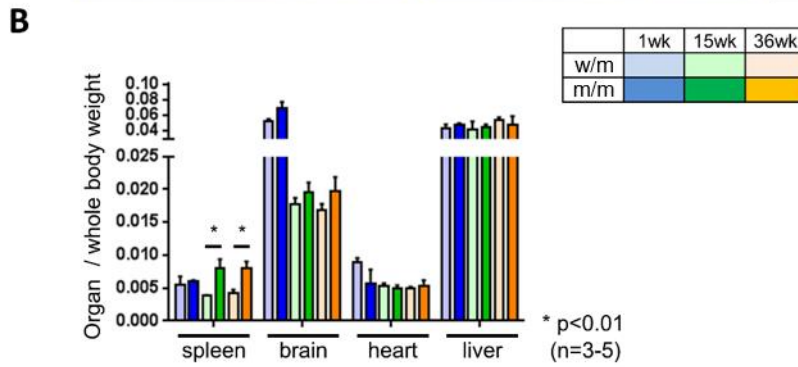

A Organs in heterozygous mice and mutant mice are indicated.

B Proportion of organ over whole body weight is indicated for spleen, brain, heart and liver at 1, 15 and 36 weeks after birth. Data were collected from at least 3 mice, and expressed as mean and S.D.

Supplementary Figure 6. Mutant mice demonstrating specific features in spleen

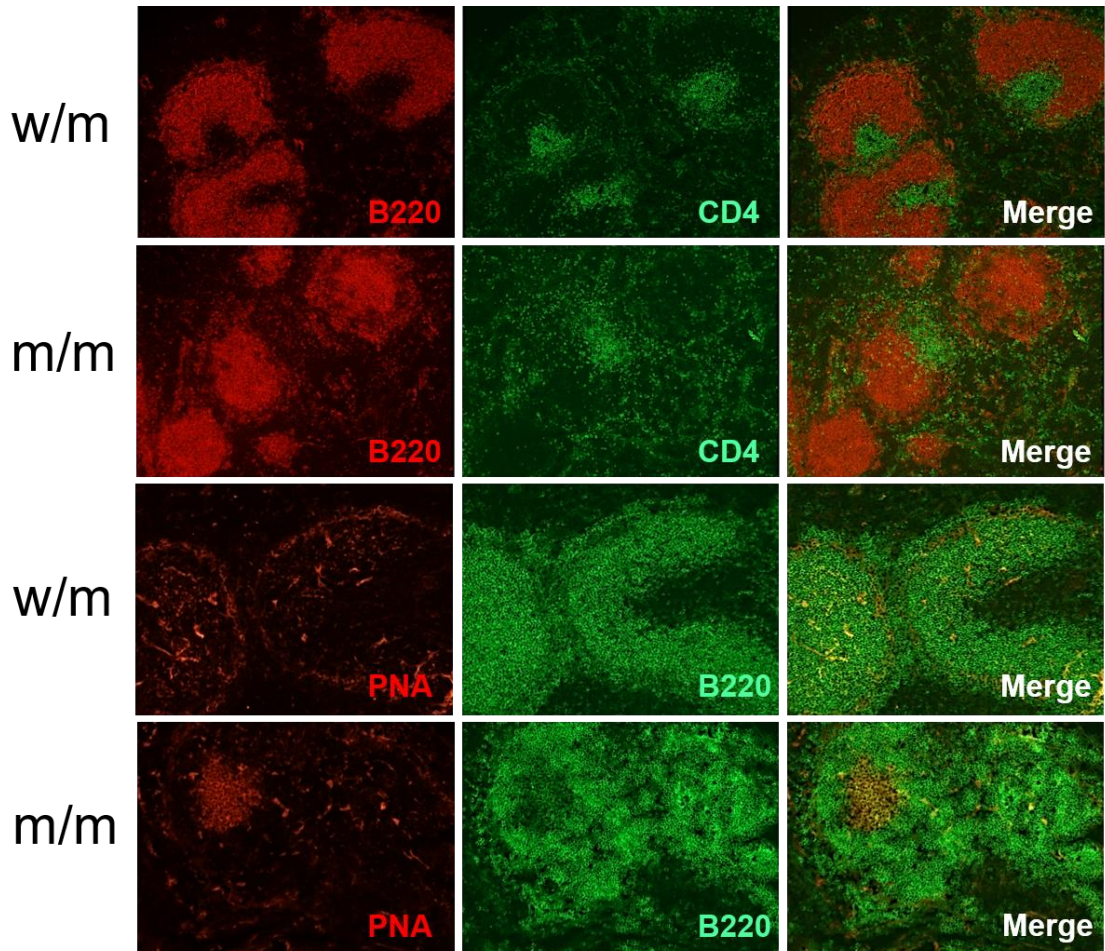

Representative images of spleens from heterozygote and mutant mouse are indicated. Tissue sections were stained with B220 (red) and CD4 (green), or PNA (red), and B220 (green). Altered architectures of splenic white pulp and PNA<sup>+</sup>B220<sup>+</sup> cells were noted in the mutant spleens.



Supplementary Figure 7. Histological analysis reveals comparable results between mutant and heterozygous mice for organs other than spleen and lymph nodes.

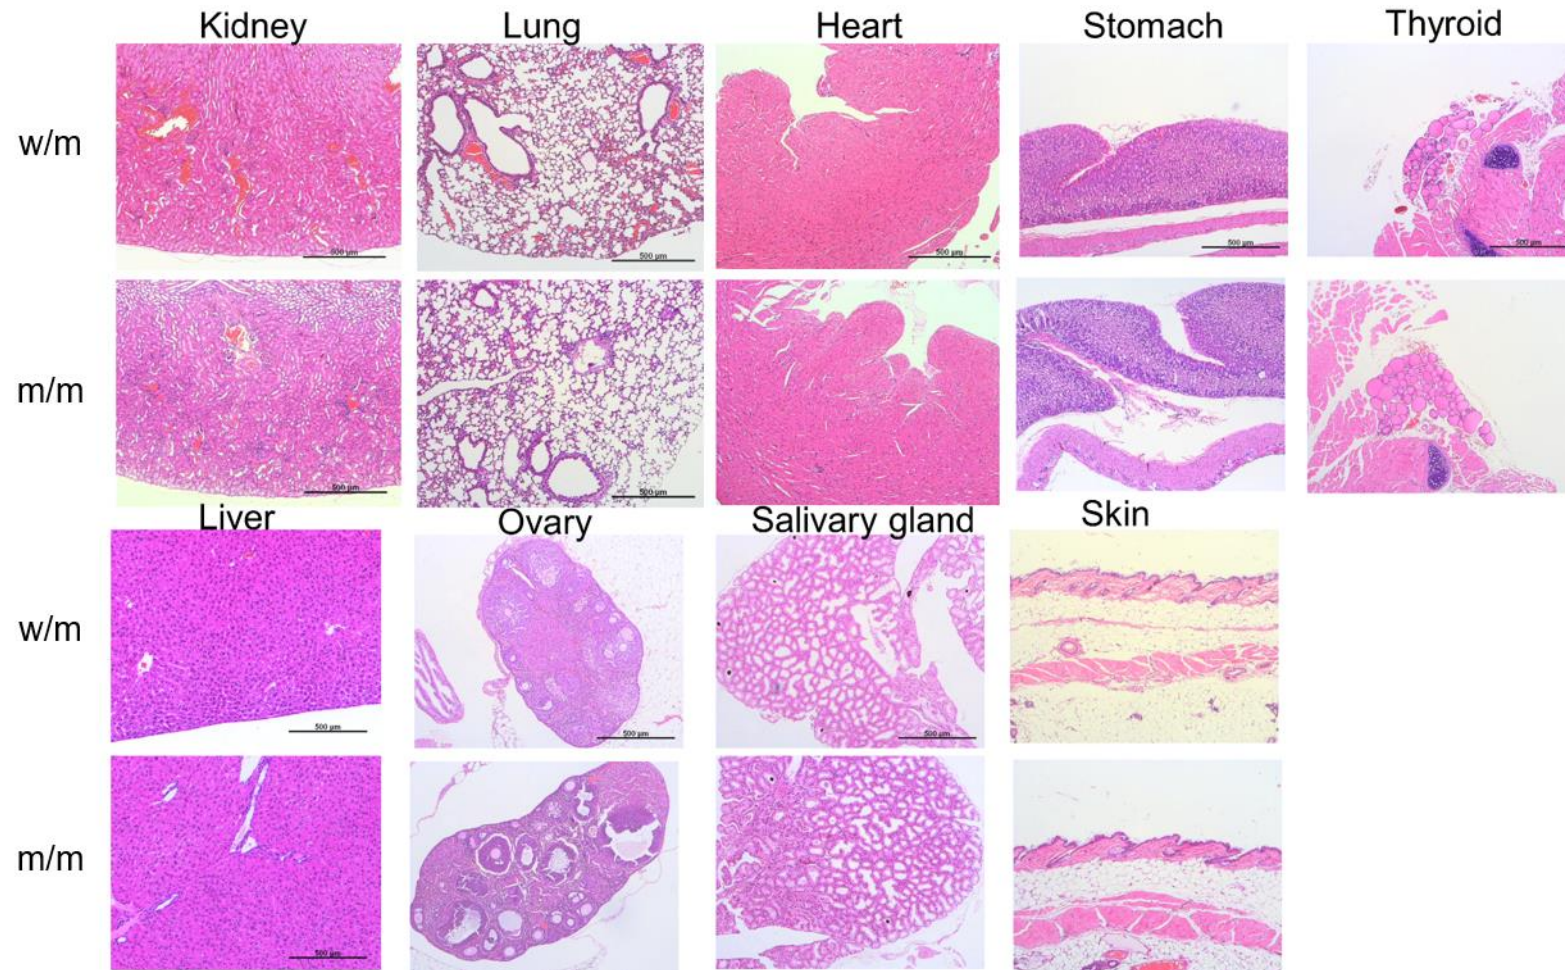



Supplementary Figure 8. The ontogeny of B and T cells in spleen, and In vitro B cell proliferation assay.

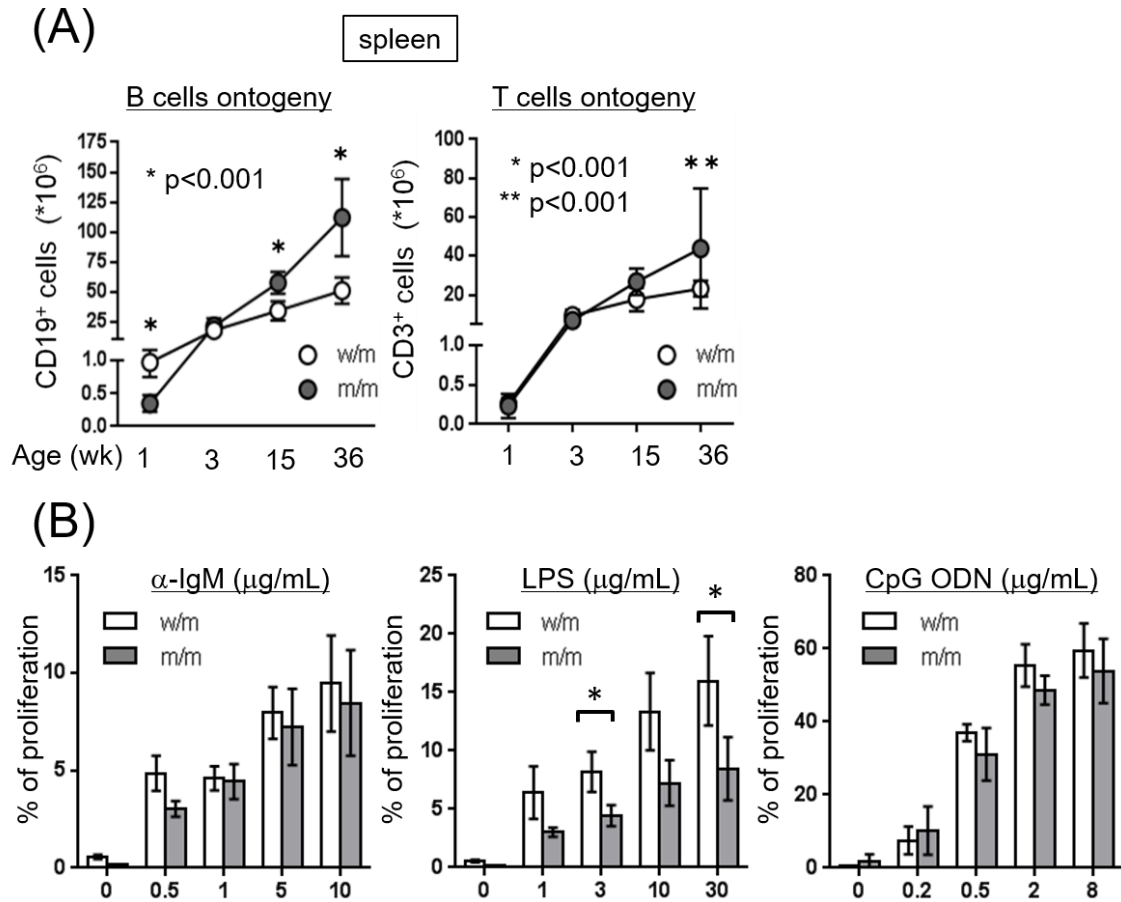

A. The number of CD19<sup>+</sup> B cells, CD3<sup>+</sup> T cells in spleen Data were collected from at least 4 mice, and expressed as mean and S.D.

B. CFSE labeled purified CD19<sup>+</sup> B cell proliferation with indicated doses of anti-IgM (0, 0.5, 1, 5, 10 μg/mL), LPS (0, 1, 3, 10, 30 μg/mL), CpG ODN2395 (0, 0.2, 0.5, 2, 8 μg/mL) were determined at 72 hours by flowcytometry. All experiments were performed with triplicate samples, at least 2 independent experiments, and data were presented as mean and S.D.

\* p<0.05, \*\*p<0.01

Supplementary Figure 9. Gene expression analysis of proinflammatory cytokines in spleen.

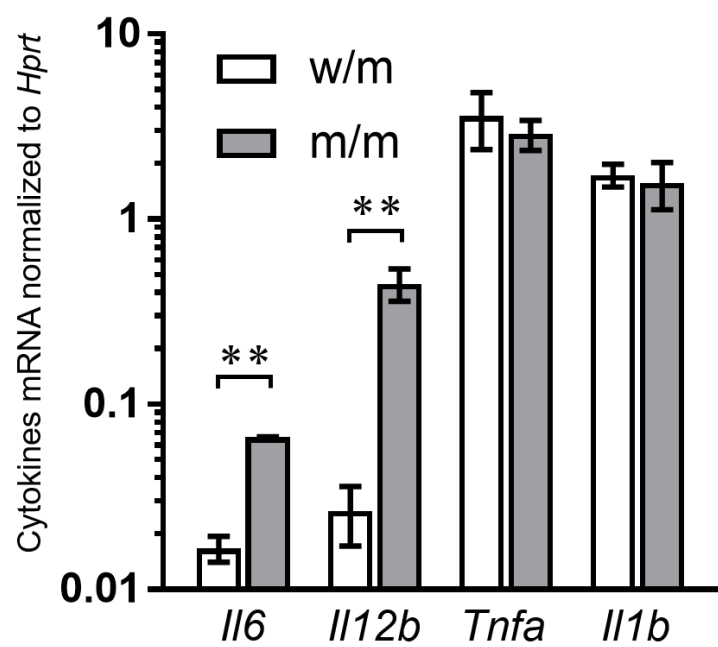

Supplementary Table 1. Subjects of GWAS meta-analysis of SLE patients

|             | Case                                                  | Control                                        |
|-------------|-------------------------------------------------------|------------------------------------------------|
| Study 1     |                                                       |                                                |
| Number      | 474                                                   | 2162                                           |
| Female      |                                                       |                                                |
| Ratio       | 0.924                                                 | 0.507                                          |
| Array       | Illumina Human Core<br>Exome                          | Illumina Human Core<br>Exome                   |
| Institution | Kyoto University                                      | Aichi Cancer Center<br>Hospital                |
| Study 2     |                                                       |                                                |
| Number      | 889                                                   | 3374                                           |
| Female      |                                                       |                                                |
| Ratio       | 0.896                                                 | 0.445                                          |
| Array       | Illumina HumanHap610-<br>Quad Genotyping<br>BeadChips | Illumina HumanHap550v3<br>Genotyping BeadChips |
| Institution | RIKEN                                                 | RIKEN                                          |

Supplementary Table 2. Criteria of quality controls for samples and SNPs and analyses in the two GWAS.

|              | Set1                  | Set2                  |
|--------------|-----------------------|-----------------------|
| Samples      |                       |                       |
| Call Rate    | <0.98                 | <0.98                 |
| kinship      | PI_HAT>0.25           | PI_HAT>0.25           |
| PCA outliers | excluded              | excluded              |
| SNP          |                       |                       |
| Call Rate    | <0.98                 | <0.99                 |
| maf          | <0.03                 | <0.01                 |
| HWE P        | <1.0x10 <sup>-6</sup> | <1.0x10 <sup>-6</sup> |
| Rsq          | <0.5                  | <0.5                  |
| Analysis     |                       |                       |
| tool         | plink                 | Mach2dat              |
| covariates   | -                     | PC1-5                 |

Supplementary Table 3. Shared risk alleles between the current study and previous reports in SLE-related loci.

| SNP        | Chr | Pos       | Gene      | Risk Allele | Beta  | SE    | P                    | Reported Risk Allele | Shared Risk Allele |
|------------|-----|-----------|-----------|-------------|-------|-------|----------------------|----------------------|--------------------|
| rs1801274  | 1   | 161479745 | FCGR2A    | G           | 0.173 | 0.053 | 0.0011               | G                    | Y                  |
| rs34889541 | 1   | 198594769 | PTPRC     | G           | 0.166 | 0.058 | 0.0040               | G                    | Y                  |
| rs2297550  | 1   | 206643772 | IKBKE     | G           | 0.082 | 0.044 | 0.064                | G                    | Y                  |
| rs3024505  | 1   | 206939904 | IL10      | A           | 0.322 | 0.16  | 0.044                | A                    | Y                  |
| rs9782955  | 1   | 236039877 | LYST      | C           | 0.186 | 0.074 | 0.012                | C                    | Y                  |
| rs564799   | 3   | 159728987 | IL12A     | C           | 0.197 | 0.084 | 0.019                | C                    | Y                  |
| rs6762714  | 3   | 188470238 | LPP,      | T           | 0.052 | 0.057 | 0.36                 | T                    | Y                  |
| rs340630   | 4   | 87958395  | AFF1      | A           | 0.163 | 0.043 | 0.00017              | A                    | (Y)                |
| rs10028805 | 4   | 102737250 | BANK1     | G           | 0.25  | 0.051 | 8.6x10 <sup>-7</sup> | G                    | Y                  |
| rs7726159  | 5   | 1282319   | TERT      | A           | 0.172 | 0.050 | 0.00055              | A                    | Y                  |
| rs7726414  | 5   | 133431834 | TCF7 SKP1 | T           | 0.284 | 0.080 | 0.00042              | T                    | Y                  |
| rs10036748 | 5   | 150458146 | TNIP1     | T           | 0.139 | 0.049 | 0.0044               | T                    | Y                  |
| rs2421184  | 5   | 158886939 | IL12B     | A           | 0.166 | 0.043 | 0.00013              | A                    | Y                  |
| rs2431697  | 5   | 159879978 | MIR146A   | T           | 0.178 | 0.058 | 0.0021               | T                    | Y                  |
| rs17603856 | 6   | 16630898  | ATXN1     | G           | 0.019 | 0.066 | 0.78                 | T                    | N                  |
| rs9462027  | 6   | 34797241  | UHRF1BP1  | A           | 0.247 | 0.079 | 0.0018               | A                    | Y                  |
| rs10807150 | 6   | 35272274  | DEF6      | C           | 0.148 | 0.045 | 0.0011               | C                    | Y                  |
| rs597325   | 6   | 91002494  | BACH2     | G           | 0.14  | 0.043 | 0.0012               | G                    | Y                  |
| rs849142*  | 7   | 28185891  | JAZF1     | T           | 0.679 | 0.65  | 0.30                 | T                    | Y                  |

|             |    |           |                  |   |       |       |                      |   |   |
|-------------|----|-----------|------------------|---|-------|-------|----------------------|---|---|
| rs73135369  | 7  | 73940978  | GTF2IRD1-GTF2I   | C | 0.152 | 0.095 | 0.11                 | C | Y |
| rs3757387   | 7  | 128576086 | IRF5             | C | 0.289 | 0.059 | 8.9x10 <sup>-7</sup> | C | Y |
| rs1887428   | 9  | 4984530   | JAK2             | G | 0.099 | 0.047 | 0.035                | G | Y |
| rs4948496   | 10 | 63805617  | ARID5B           | T | 0     | 0.047 | 1.0                  | C | N |
| rs12802200* | 11 | 566936    | IRF7             | C | 0.802 | 0.39  | 0.042                | C | Y |
| rs2732549   | 11 | 35088399  | CD44             | A | 0.139 | 0.053 | 0.0082               | A | Y |
| rs2009453   | 11 | 65399528  | PCNXL3           | C | 0.145 | 0.045 | 0.0014               | C | Y |
| rs494003    | 11 | 65542298  | RNASEH2C         | A | 0.051 | 0.070 | 0.46                 | A | Y |
| rs3794060   | 11 | 71187679  | DHCR7<br>NADSYN1 | C | 0.008 | 0.046 | 0.86                 | C | Y |
| rs1059312   | 12 | 129278864 | SLC15A4          | G | 0.165 | 0.043 | 0.00013              | G | Y |
| rs4902562*  | 14 | 68731458  | RAD51B           | A | 0.101 | 0.057 | 0.076                | A | Y |
| rs12900339  | 15 | 38927386  | RASGRP1          | A | 0.167 | 0.046 | 0.00027              | A | Y |
| rs2289583   | 15 | 75311036  | CSK              | A | 0.109 | 0.053 | 0.041                | A | Y |
| rs9652601   | 16 | 11174365  | CIITA SOCS1      | G | 0.113 | 0.059 | 0.055                | G | Y |
| rs1170426   | 16 | 68603798  | ZFP90            | C | 0.158 | 0.054 | 0.0032               | C | Y |
| rs2286672   | 17 | 4712617   | PLD2             | T | 0.018 | 0.045 | 0.68                 | T | Y |
| rs1610555   | 18 | 67543147  | CD226            | T | 0.151 | 0.045 | 0.00081              | T | Y |
| rs2304256   | 19 | 10475652  | TYK2             | C | 0.048 | 0.046 | 0.29                 | C | Y |
| rs2305772   | 19 | 52033742  | SIGLEC6          | G | 0.167 | 0.044 | 0.00014              | G | Y |
| rs61616683  | 22 | 39755773  | SYNGR1           | T | 0.184 | 0.072 | 0.011                | T | Y |
| rs1734787   | 23 | 153325446 | IRAK1 MECP2      | C | 0.219 | 0.061 | 0.00035              | C | Y |

---

\*Results in one of the two Japanese GWAS due to filtering



Previous SLE loci reported by only a manuscript containing part of the Japanese GWAS are excluded from the results except for AFF1.

Supplementary Table 4. SLE-susceptibility SNPs (84 SNPs including the current 2 SNPs) showed enrichment of enhancer histone marks in immune-related cells.

| Cell Type                                           | P-value               |
|-----------------------------------------------------|-----------------------|
| Primary B cells from peripheral blood               | <1.0x10 <sup>-6</sup> |
| Primary Natural Killer cells from peripheral blood  | <1.0x10 <sup>-6</sup> |
| GM12878 Lymphoblastoid Cells                        | <1.0x10 <sup>-6</sup> |
| Primary monocytes from peripheral blood             | <1.0x10 <sup>-6</sup> |
| Primary T helper cells PMA-I stimulated             | <1.0x10 <sup>-6</sup> |
| Primary neutrophils from peripheral blood           | <1.0x10 <sup>-6</sup> |
| Primary T cells from peripheral blood               | <1.0x10 <sup>-6</sup> |
| Primary T CD8+ naive cells from peripheral blood    | <1.0x10 <sup>-6</sup> |
| Spleen                                              | <1.0x10 <sup>-6</sup> |
| Primary mononuclear cells from peripheral blood     | 0.000001              |
| Thymus                                              | 0.000001              |
| Primary hematopoietic stem cells short term culture | 0.000001              |
| K562 Leukemia Cells                                 | 0.000002              |
| Primary B cells from cord blood                     | 0.000003              |
| Brain Inferior Temporal Lobe                        | 0.000003              |
| Monocytes-CD14+ RO01746 Primary Cells               | 0.000006              |
| Primary T cells from cord blood                     | 0.000007              |
| Primary T CD8+ memory cells from peripheral blood   | 0.000008              |
| Fetal Thymus                                        | 0.000012              |
| Primary T helper memory cells from peripheral blood | 0.000016              |
| 2                                                   |                       |
| NHLF Lung Fibroblast Primary Cells                  | 0.000025              |
| Primary T helper cells from peripheral blood        | 0.000026              |
| Primary hematopoietic stem cells G-CSF-mobilized    | 0.000027              |
| Male                                                |                       |
| Lung                                                | 0.000042              |
| Sigmoid Colon                                       | 0.000046              |
| Primary T helper naive cells from peripheral blood  | 0.000047              |
| Fetal Heart                                         | 0.000095              |
| Brain Cingulate Gyrus                               | 0.00016               |
| Primary hematopoietic stem cells G-CSF-mobilized    | 0.00018               |
| Female                                              |                       |

|                                                             |         |
|-------------------------------------------------------------|---------|
| Mesenchymal Stem Cell Derived Chondrocyte<br>Cultured Cells | 0.00019 |
| Brain Angular Gyrus                                         | 0.00019 |
| Foreskin Melanocyte Primary Cells skin01                    | 0.00021 |
| NH-A Astrocytes Primary Cells                               | 0.00023 |
| Primary T regulatory cells from peripheral blood            | 0.00026 |
| Adipose Derived Mesenchymal Stem Cell Cultured<br>Cells     | 0.00027 |
| Osteoblast Primary Cells                                    | 0.00032 |

---

Cells showing significant results based on Bonferroni's correction are indicated.

Supplementary Table 5. Heritability enrichment in immune-related cells evaluated by LDSC.

| Cell Type                                                        | P                    |
|------------------------------------------------------------------|----------------------|
| CD56_primary_H3K4me1                                             | 1.7x10 <sup>-8</sup> |
| CD3_primary_(UW)_H3K4me1                                         | 2.0x10 <sup>-7</sup> |
| CD8_memory_primary_H3K4me1                                       | 2.6x10 <sup>-7</sup> |
| CD4_memory_primary_H3K4me1                                       | 2.9x10 <sup>-7</sup> |
| CD19_primary_(BI)_H3K4me1                                        | 3.2x10 <sup>-7</sup> |
| CD4+_CD25-_CD45R0+_memory_primary_H3K4me1                        | 3.6x10 <sup>-7</sup> |
| CD4+_CD25-_Th_primary_H3K4me1                                    | 4.2x10 <sup>-7</sup> |
| CD3_primary_H3K27ac                                              | 4.5x10 <sup>-7</sup> |
| CD4+_CD25-_IL17-<br>_PMA_Ionomycin_stim_MACS_Th_sprimary_H3K4me1 | 5.4x10 <sup>-7</sup> |
| CD4_naive_primary_H3K4me1                                        | 6.7x10 <sup>-7</sup> |
| CD8_naive_primary_(UCSF-UBC)_H3K4me1                             | 7.0x10 <sup>-7</sup> |
| Th1_H3K27ac                                                      | 7.5x10 <sup>-7</sup> |
| CD19_primary_(UW)_H3K4me1                                        | 7.6x10 <sup>-7</sup> |
| CD14_primary_H3K4me1                                             | 9.3x10 <sup>-7</sup> |
| CD4+_CD25-<br>_IL17+_PMA_Ionomycin_stim_Th17_primary_H3K4me1     | 1.0x10 <sup>-6</sup> |
| CD3_primary_(BI)_H3K4me1                                         | 1.1x10 <sup>-6</sup> |
| CD14_H3K27ac                                                     | 1.3x10 <sup>-6</sup> |
| CD4+_CD25+_CD127-_Treg_primary_H3K4me1                           | 2.4x10 <sup>-6</sup> |
| CD8_naive_primary_(BI)_H3K4me1                                   | 2.6x10 <sup>-6</sup> |
| CD4+_CD25-_CD45RA+_naive_primary_H3K4me1                         | 3.5x10 <sup>-6</sup> |
| Th2_H3K27ac                                                      | 4.7x10 <sup>-6</sup> |
| CD25-_IL17+_Th17_stim_H3K27ac                                    | 8.5x10 <sup>-6</sup> |
| CD25-_IL17-_Th_stim_MACS_H3K27ac                                 | 1.4x10 <sup>-5</sup> |
| Treg_primary_H3K4me3                                             | 1.4x10 <sup>-5</sup> |
| Peripheralblood_mononuclear_primary_H3K9ac                       | 1.6x10 <sup>-5</sup> |
| CD19_primary_(BI)_H3K4me3                                        | 2.0x10 <sup>-5</sup> |
| Th0_H3K27ac                                                      | 2.1x10 <sup>-5</sup> |
| CD4+_CD25+_CD127-_Treg_primary_H3K4me3                           | 2.2x10 <sup>-5</sup> |
| CD4+_CD25-<br>_IL17+_PMA_Ionomycin_stim_Th17_primary_H3K4me3     | 2.8x10 <sup>-5</sup> |
| CD56_primary_H3K4me3                                             | 3.2x10 <sup>-5</sup> |

|                                              |                      |
|----------------------------------------------|----------------------|
| CD4+_CD25-_IL17-                             |                      |
| _PMA_Ionomycin_stim_MACS_Th_sprimary_H3K4me3 | 3.3x10 <sup>-5</sup> |
| CD4+_CD25int_CD127+_Tmem_primary_H3K4me1     | 4.4x10 <sup>-5</sup> |
| Peripheralblood_mononuclear_primary_H3K4me3  | 4.4x10 <sup>-5</sup> |
| Fetal_thymus_H3K4me1                         | 4.7x10 <sup>-5</sup> |
| CD20_H3K27ac                                 | 5.9x10 <sup>-5</sup> |
| CD4_primary_H3K4me3                          | 8.4x10 <sup>-5</sup> |
| CD25+_CD127-_Treg_H3K27ac                    | 8.6x10 <sup>-5</sup> |
| CD4+_CD25-_Th_primary_H3K4me3                | 9.3x10 <sup>-5</sup> |
| CD25int_CD127+_Tmem_H3K27ac                  | 9.8x10 <sup>-5</sup> |
| CD19_H3K27ac                                 | 1.1x10 <sup>-4</sup> |
| CD8_memory_primary_H3K4me3                   | 1.2x10 <sup>-4</sup> |
| CD19_primary_(UW)_H3K4me3                    | 1.4x10 <sup>-4</sup> |
| Peripheralblood_mononuclear_primary_H3K4me1  | 1.6x10 <sup>-4</sup> |
| CD4_naive_primary_H3K4me3                    | 1.7x10 <sup>-4</sup> |
| CD4+_CD25-_CD45RA+_naive_primary_H3K4me3     | 1.9x10 <sup>-4</sup> |
| CD3_primary_(UW)_H3K4me3                     | 2.0x10 <sup>-4</sup> |
| CD4+_CD25-_CD45R0+_memory_primary_H3K4me3    | 2.2x10 <sup>-4</sup> |

---

Significant results based on Bonferroni's correction ( $p > 0.05/220$ ) are indicated.

Supplementary Table 6. Pathways shown by PASCAL.

| Database | Pathway                                                                         | empPvalue            |
|----------|---------------------------------------------------------------------------------|----------------------|
| REACTOME | IMMUNE SYSTEM                                                                   | $3.0 \times 10^{-7}$ |
| REACTOME | ADAPTIVE IMMUNE SYSTEM                                                          | $3.3 \times 10^{-5}$ |
| BIOCARTA | NO2IL12 PATHWAY                                                                 | $3.8 \times 10^{-4}$ |
| BIOCARTA | IL12 PATHWAY                                                                    | $4.6 \times 10^{-4}$ |
| BIOCARTA | IL22BP PATHWAY                                                                  | $5.7 \times 10^{-4}$ |
| KEGG     | LEISHMANIA INFECTION                                                            | $7.3 \times 10^{-4}$ |
| BIOCARTA | NFKB PATHWAY                                                                    | $7.4 \times 10^{-4}$ |
| REACTOME | SIGNALING BY THE B CELL RECEPTOR BCR                                            | $8.6 \times 10^{-4}$ |
| BIOCARTA | CD40 PATHWAY                                                                    | $9.2 \times 10^{-4}$ |
| BIOCARTA | IL10 PATHWAY                                                                    | $1.2 \times 10^{-3}$ |
| REACTOME | INTERFERON ALPHA BETA SIGNALING                                                 | $1.3 \times 10^{-3}$ |
| KEGG     | NOD LIKE RECEPTOR SIGNALING PATHWAY                                             | $1.4 \times 10^{-3}$ |
| BIOCARTA | PARKIN PATHWAY                                                                  | $1.6 \times 10^{-3}$ |
| REACTOME | ANTIGEN ACTIVATES B CELL RECEPTOR LEADING TO<br>GENERATION OF SECOND MESSENGERS | $1.9 \times 10^{-3}$ |
| KEGG     | PATHWAYS IN CANCER                                                              | $2.2 \times 10^{-3}$ |
| BIOCARTA | BIOPEPTIDES PATHWAY                                                             | $2.3 \times 10^{-3}$ |
| BIOCARTA | EGF PATHWAY                                                                     | $2.4 \times 10^{-3}$ |
| BIOCARTA | PDGF PATHWAY                                                                    | $3.1 \times 10^{-3}$ |
| BIOCARTA | TNFR2 PATHWAY                                                                   | $3.4 \times 10^{-3}$ |
| REACTOME | INTERFERON GAMMA SIGNALING                                                      | $4.4 \times 10^{-3}$ |

Results with p-values less than 0.005 are indicated
